# Supplementary material
Source: publisher figshare collection journal article supplement (https://gsapubs.figshare.com/ndownloader/files/31411633)
Supplement: Supplementary file 1 [file 31411633]

## Sheet: Table S1
TABLE S1. GPS LOCATIONS OF STUDY SITES
Site	Lat	Lon	Landform
Monahans
M1	31.644	-102.864	Active dune
M2	31.644	-102.864	Active dune
M3	31.644	-102.865	Active dune
M4	31.6623	-102.892	Interdune
M5	31.6624	-102.892	Interdune
M6	31.6624	-102.892	Interdune
M7	31.6625	-102.892	Interdune
M8	31.6812	-102.906	Active dune
M8-8	31.6814	-102.906	Active dune
M9	31.6812	-102.906	Active dune
M10	31.6812	-102.906	Active dune
M11	31.6811	-102.906	Active dune
M12	31.6812	-102.907	Interdune
M13	31.6798	-102.907	Active dune
M14	31.6794	-102.907	Active dune
M15	31.6503	-102.906	Sand sheet
M16	31.6497	-102.905	Sand sheet
M17	31.6372	-102.889	Sand sheet
M18	31.6429	-102.893	Sand sheet
M19	31.6437	-102.89	Veg dune
M20	31.6438	-102.89	Veg dune
M21	31.6439	-102.89	Veg dune
M22	31.6472	-102.917	Veg dune
M23	31.6711	-102.928	Sand sheet
M24	31.7008	-102.886	Active dune
M25	31.7007	-102.886	Active dune
M26	31.7006	-102.886	Interdune
M27	31.7006	-102.887	Interdune
M28	31.7071	-102.872	Sand sheet
White Sands
W1	32.8713	-106.307	Sand sheet
W2	32.8699	-106.336	Playa
W3	32.8225	-106.453	Playa
W4	32.8424	-106.416	Playa
W5	32.8356	-106.39	Playa
W6	32.8344	-106.384	Playa
W7	32.832	-106.375	Playa
W8	32.8308	-106.371	Sand sheet
W9	32.8247	-106.352	Playa
W10	32.8242	-106.345	Sand sheet
W11	32.8227	-106.326	Sand sheet
W12	32.8214	-106.307	Interdune
W13	32.8214	-106.306	Interdune
W14	32.8214	-106.305	Active dune
W15	32.8213	-106.305	Active dune
W16	32.8167	-106.289	Active dune
W17	32.8168	-106.29	Active dune
W18	32.8164	-106.289	Interdune
W19	32.7812	-106.176	Active dune
W20	32.6932	-106.383	Playa
W21	32.6964	-106.449	Playa

## Sheet: G49488
Sweeney, M.R., Forman, S.L., and McDonald, E.V., 2021, Contemporary and future dust sources and emission fluxes from gypsum- and quartz-dominated eolian systems, New Mexico and Texas, USA: Geology, https://doi.org/10.1130/G49488.1
